# Supplementary material for: SimBA: A methodology and tools for evaluating the performance of RNA-Seq bioinformatic pipelines
Source: PubMed Central journal article supplement (PMC5623974; doi:10.1186/s12859-017-1831-5), 2017-09-29
Supplement: 12859_2017_1831_MOESM1_ESM.pdf [file 12859_2017_1831_MOESM1_ESM.pdf]

## Supplemental Materials: A methodology and tools for evaluating the performance of RNA-Seq bioinformatic pipelines

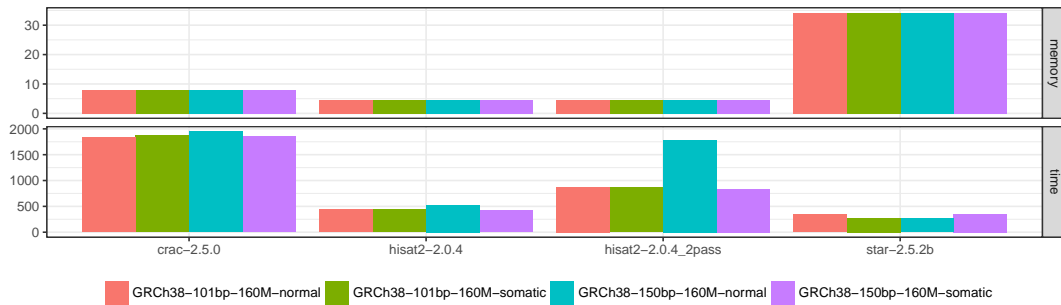

### Supplementary Figure 1: Memory and time of mapping softwares

Performances were measured with `unix /usr/bin/time` command. Mappers were run with 10 cores. Time is set to *user* time (in minutes), while memory is set to *max memory usage* (in Gb).

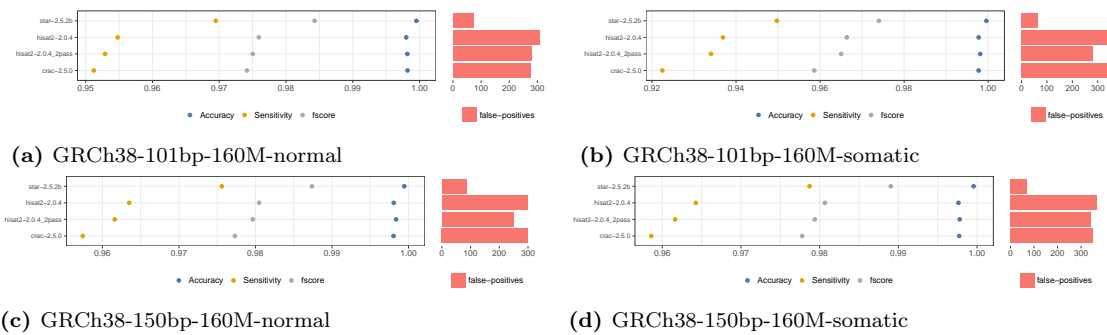

### Supplementary Figure 2: Accuracy sensitivity for alignments

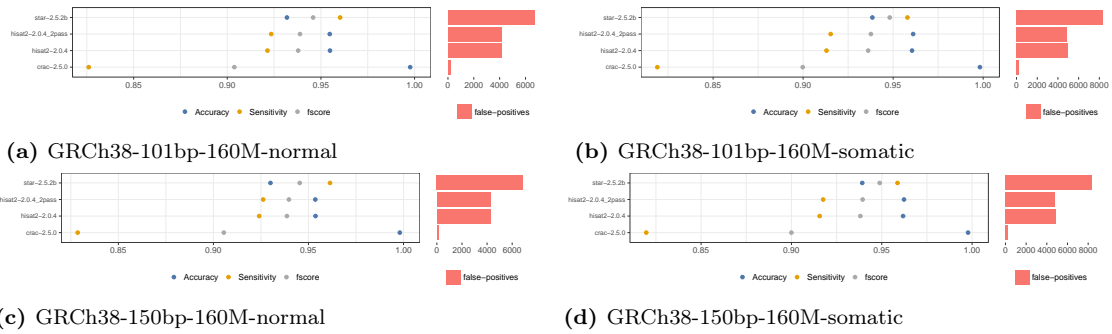

Supplementary Figure 3: Accuracy sensitivity for splices

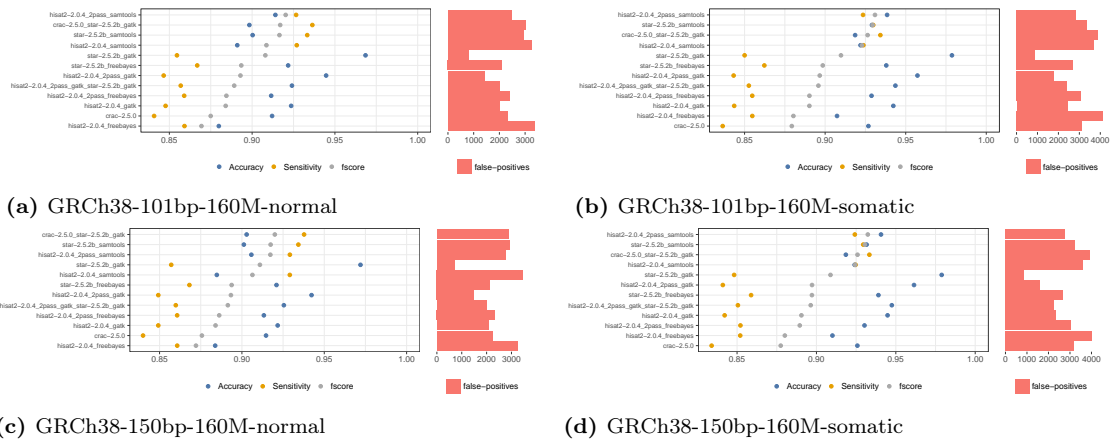

Supplementary Figure 4: Accuracy sensitivity for snps

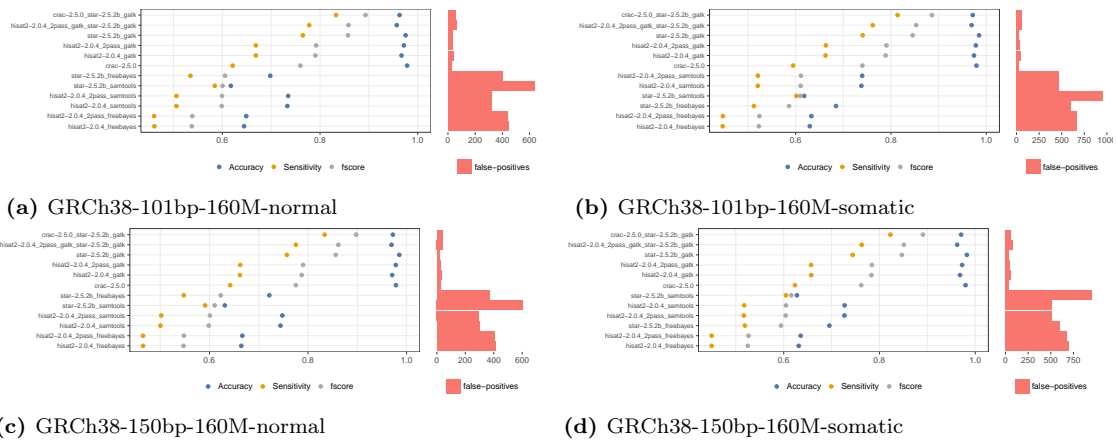

Supplementary Figure 5: Accuracy sensitivity for insertions

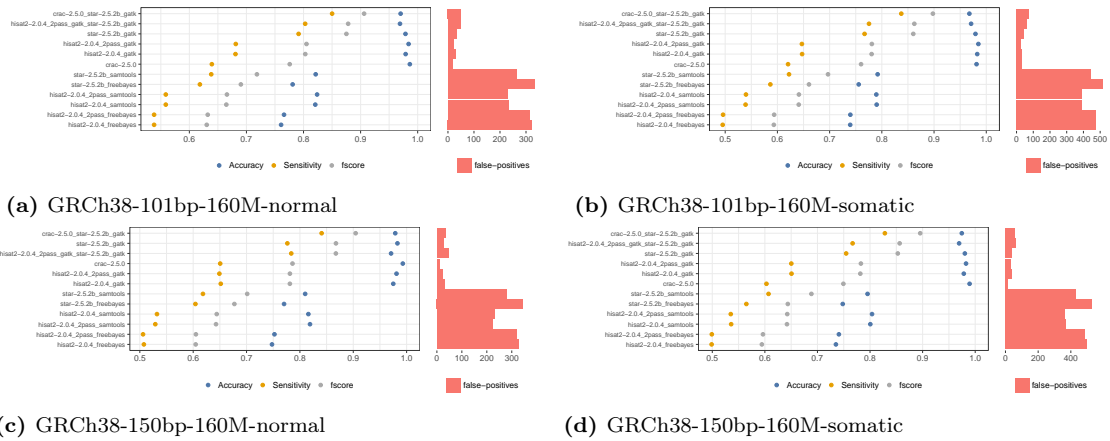

Supplementary Figure 6: Accuracy sensitivity for deletions

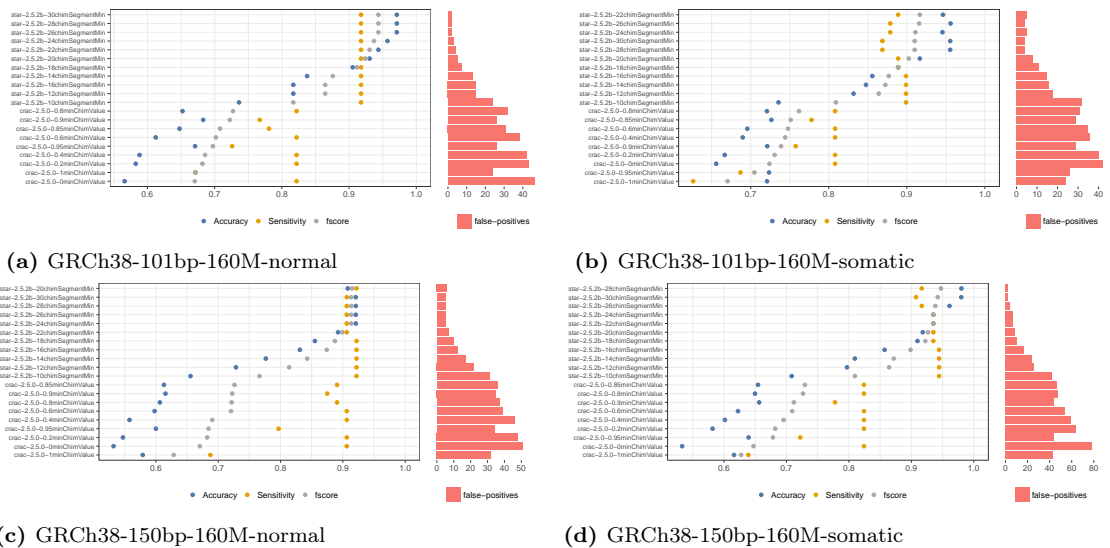

Supplementary Figure 7: Accuracy sensitivity for colinear\_fusions

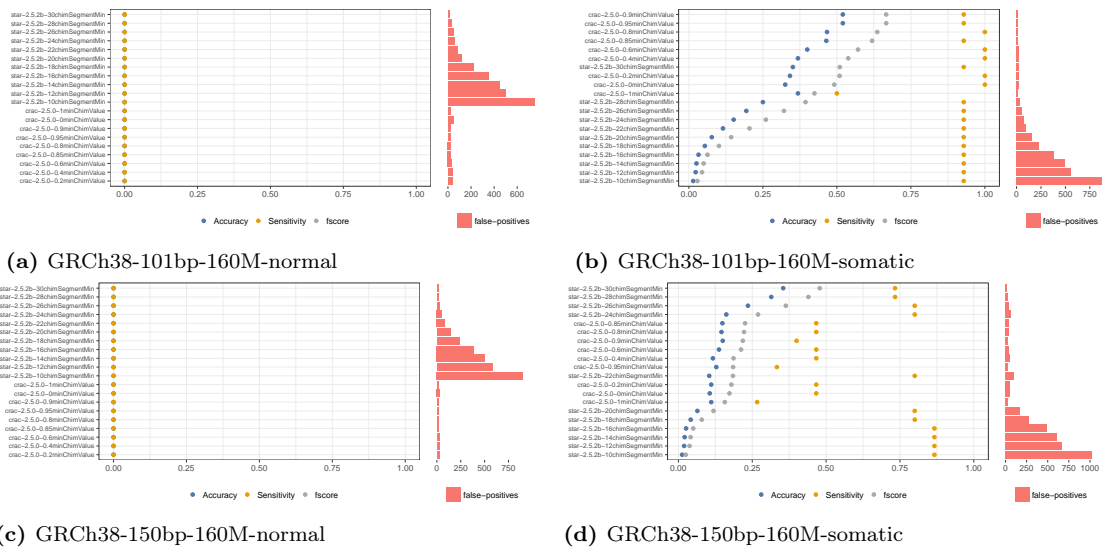

Supplementary Figure 8: Accuracy sensitivity for noncolinear\_fusions
